# Supplementary material for: Liquid phase catalytic transfer hydrogenation of ethyl levulinate to γ-valerolactone over ZrO2/SBA-15
Source: Royal Society of Chemistry journal article supplement (doi:10.1039/d2cy00538g), 2022-01-01
Supplement: d2cy00538g1.pdf [file d2cy00538g1.pdf]

Supplementary Information

**Liquid phase catalytic transfer hydrogenation of ethyl levulinate to  $\gamma$ -valerolactone over  $\text{ZrO}_2/\text{SBA-15}$**

Amin Osatiashtiani,<sup>a</sup> Samantha A. Orr,<sup>b</sup> Lee J. Durndell,<sup>c</sup> Irene Collado García,<sup>a,d</sup> Andrea Merenda,<sup>b</sup> Adam F. Lee\*<sup>b</sup> and Karen Wilson\*<sup>b</sup>

<sup>a</sup>Energy & Bioproducts Research Institute (EBRI), College of Engineering & Physical Sciences, Aston University, Birmingham B4 7ET, UK.

<sup>b</sup>Centre for Advanced Materials and Industrial Chemistry, RMIT University, Melbourne VIC 3000, Australia.

<sup>c</sup>School of Geography, Earth and Environmental Sciences, University of Plymouth, Plymouth PL4 8AA, UK

<sup>d</sup>ACERINOX, S.A, 11379 Los Barrios, Cádiz, Spain.

## Surface and Bulk elemental analysis

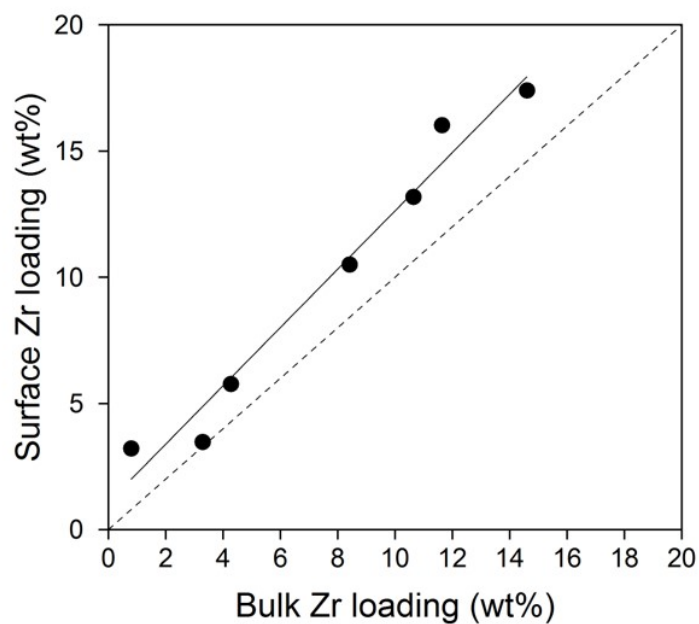

**Figure S1.** Surface versus bulk Zr loading of ZrO<sub>2</sub>/SBA-15 measured by XPS and ICP-OES, respectively.

**Table S1.** Elemental analysis of ZrO<sub>2</sub>/SBA-15 catalysts.

| Nominal Zr surface coverage / % | Zr loading / wt% (ICP) | Surface Composition (XPS) |        |        |       |        |        |
|---------------------------------|------------------------|---------------------------|--------|--------|-------|--------|--------|
|                                 |                        | O wt%                     | Zr wt% | Si wt% | O at% | Zr at% | Si at% |
| 1                               | 0.8                    | 38.6                      | 3.2    | 58.1   | 53.4  | 0.8    | 45.8   |
| 5                               | 3.3                    | 37.7                      | 3.5    | 58.8   | 52.5  | 0.9    | 46.7   |
| 10                              | 4.3                    | 34.9                      | 5.8    | 59.3   | 50.1  | 1.5    | 48.5   |
| 20                              | 8.4                    | 36.6                      | 10.5   | 52.9   | 53.3  | 2.7    | 43.9   |
| 30                              | 10.7                   | 36.2                      | 13.2   | 50.7   | 53.7  | 3.4    | 42.9   |
| 50                              | 11.6                   | 34.3                      | 16.0   | 49.7   | 52.5  | 4.3    | 43.2   |
| 100                             | 14.6                   | 33.8                      | 17.4   | 48.8   | 52.3  | 4.7    | 42.9   |
| ZrO <sub>2</sub>                | 58.8                   | 18.6                      | 81.4   | 0      | 56.6  | 43.4   | 0      |

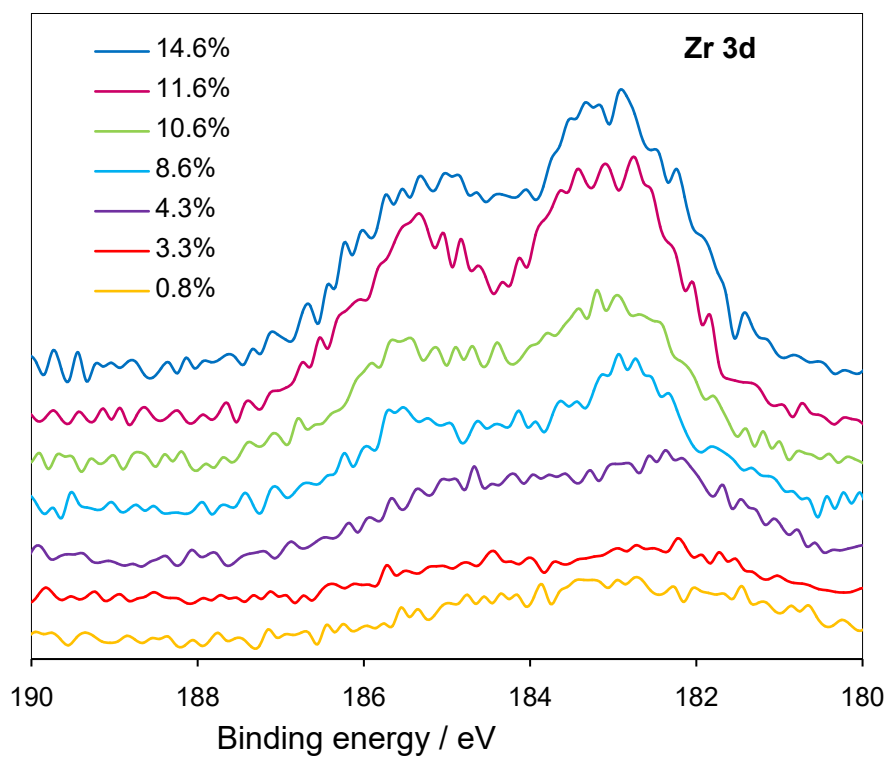

**Figure S2.** Zr 3d XP spectra of ZrO<sub>2</sub>/SBA-15 as a function of Zr surface loading (wt%).

## N<sub>2</sub> porosimetry

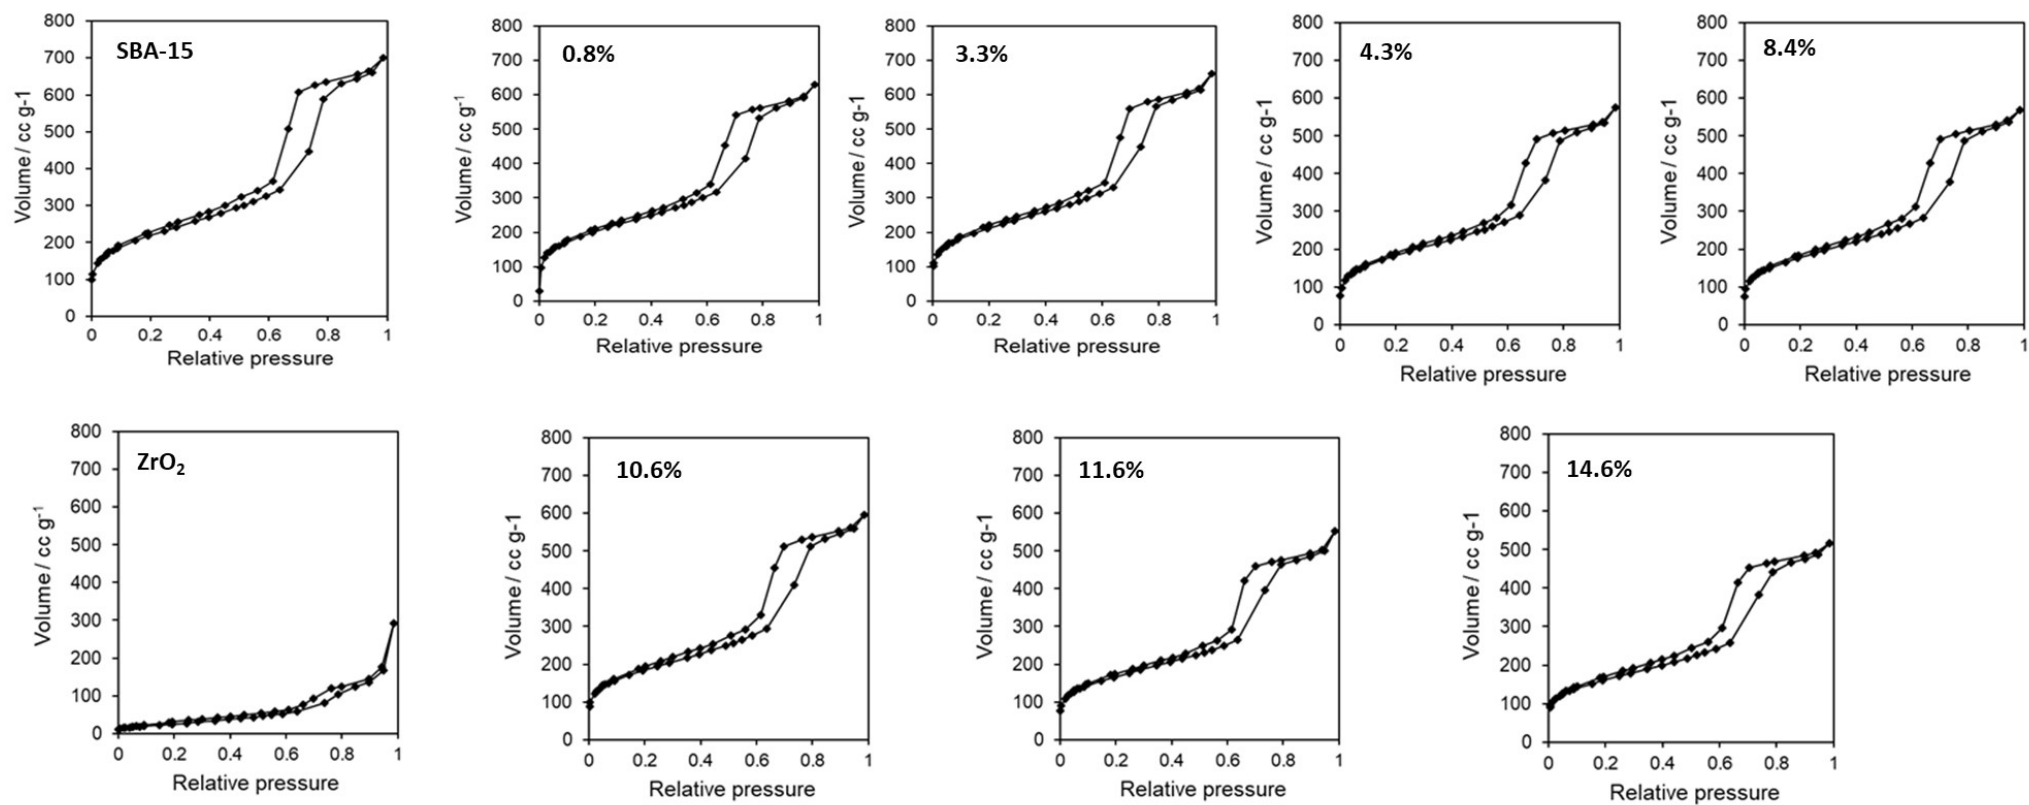

**Figure S3.** N<sub>2</sub> adsorption-desorption isotherms of ZrO<sub>2</sub>/SBA-15.

## Transmission electron microscopy

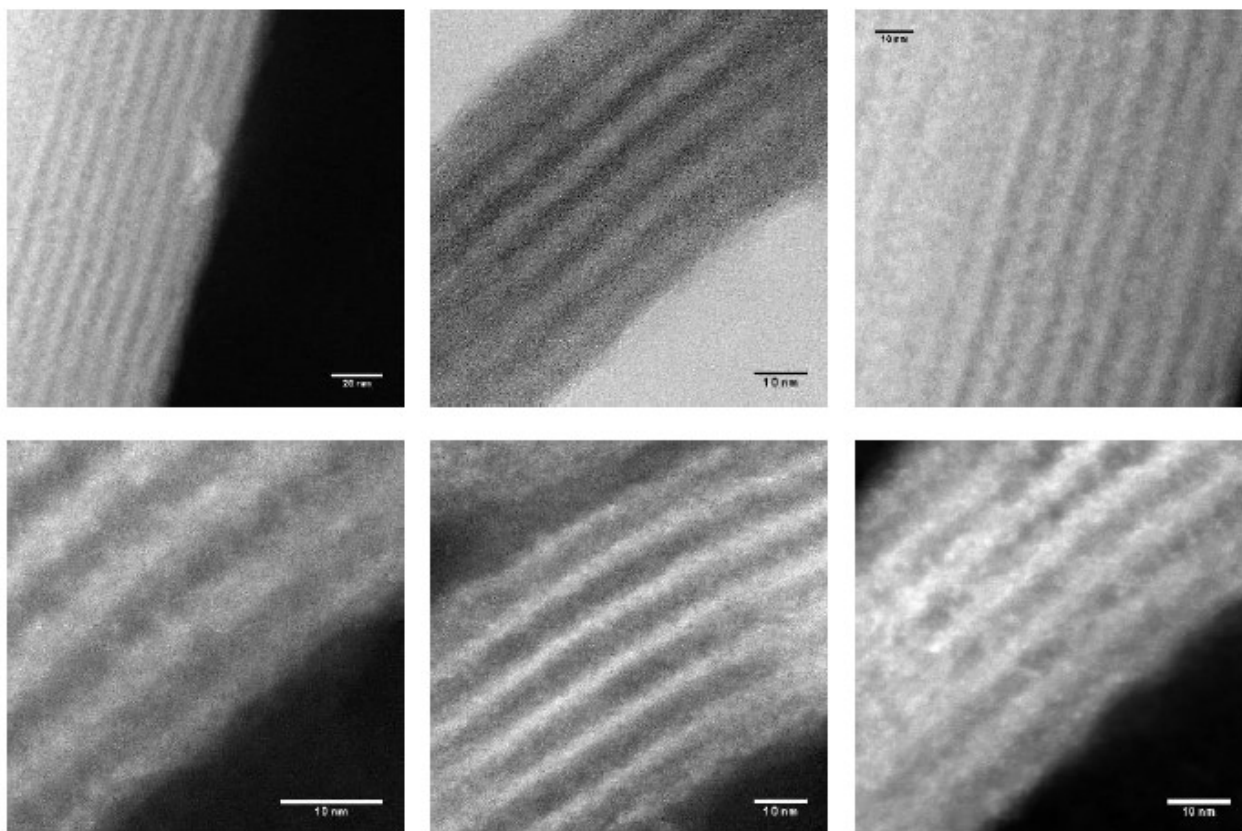

**Figure S4.** TEM micrographs of 11.6 wt% Zr/SBA-15 illustrating 2D parallel pore channels.

## X-ray Powder Diffraction (XRD)

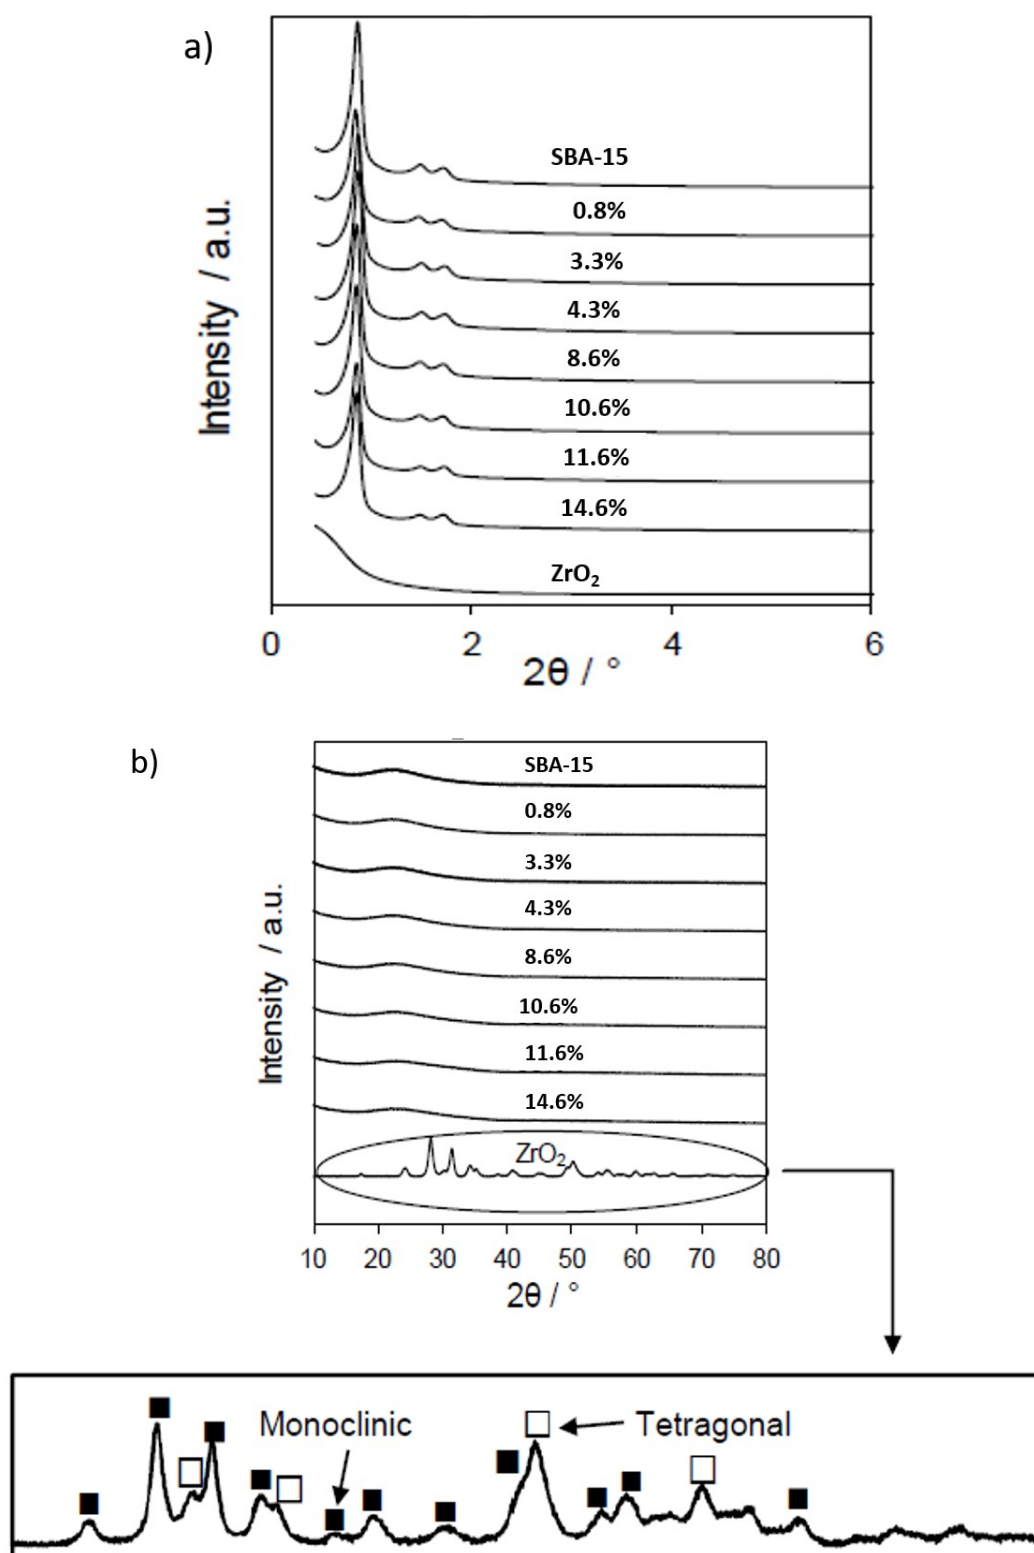

**Figure S5.** Powder X-ray diffractograms of ZrO<sub>2</sub>/SBA-15 as a function of Zr loading (wt%): (a) low angle patterns; and (b) wide angle patterns including parent SBA-15 support and bulk ZrO<sub>2</sub>.

## Acidity measurement

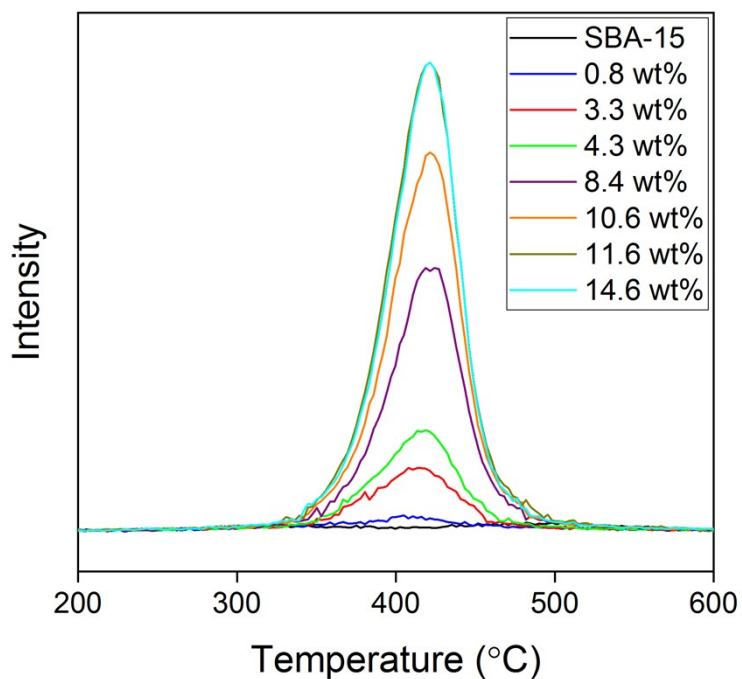

**Figure S6.** Propylamine TPD showing 41 amu mass spectrometer signal for reactively formed propene from  $\text{ZrO}_2/\text{SBA-15}$  as a function of Zr loading.

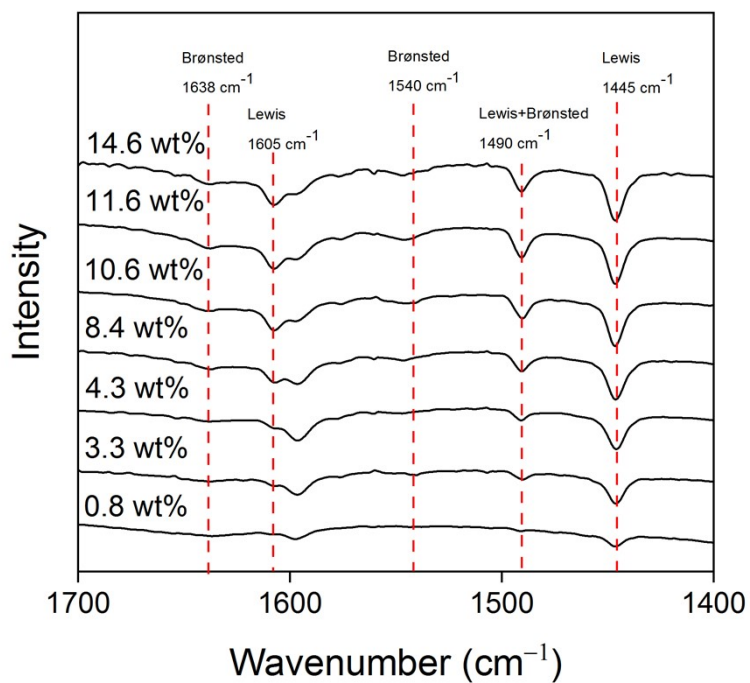

**Figure S7.** DRIFTS spectra of absorbed pyridine on pure  $\text{ZrO}_2$  and  $\text{ZrO}_2/\text{SBA-15}$ .

## Batch reactor studies

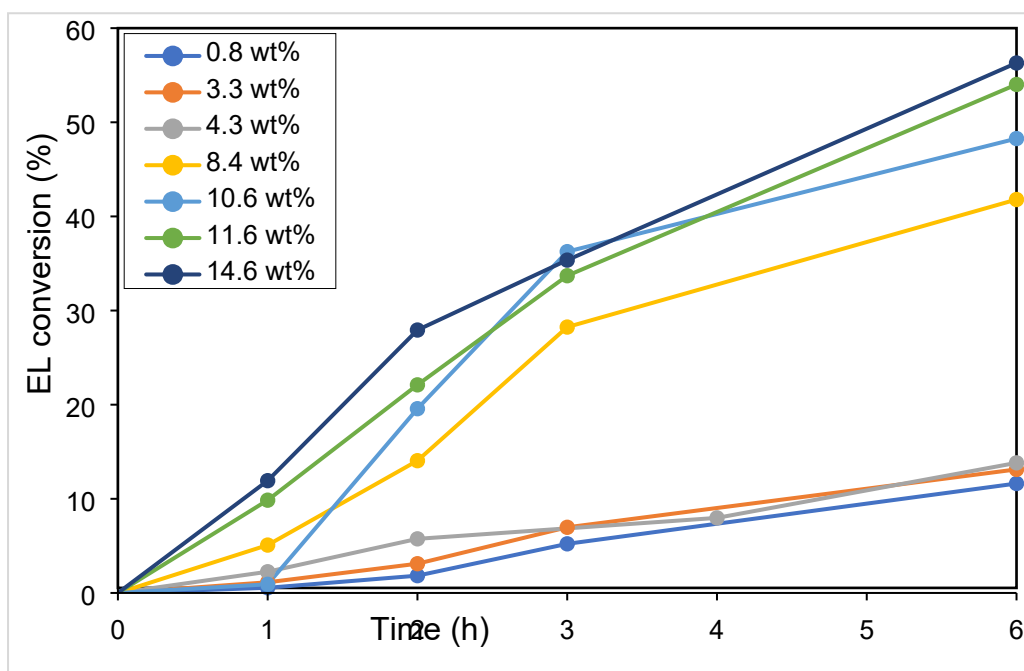

**Figure S8.** EL conversion as a function of reaction time over ZrO<sub>2</sub>/SBA-15. Reaction conditions: 5 mmol EL:250 mmol IPA, 100 mg catalyst, 170 °C, 5 bar N<sub>2</sub>.

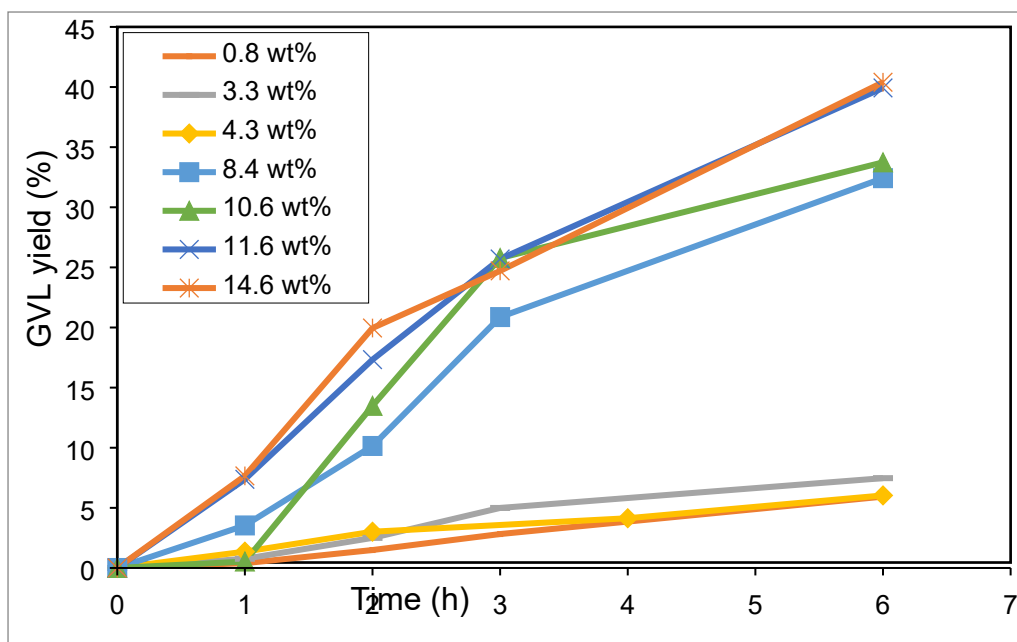

**Figure S9.** GVL yield as a function of EL reaction time over ZrO<sub>2</sub>/SBA-15. Reaction conditions: 5 mmol EL:250 mmol IPA, 100 mg catalyst, 170 °C, 5 bar N<sub>2</sub>.



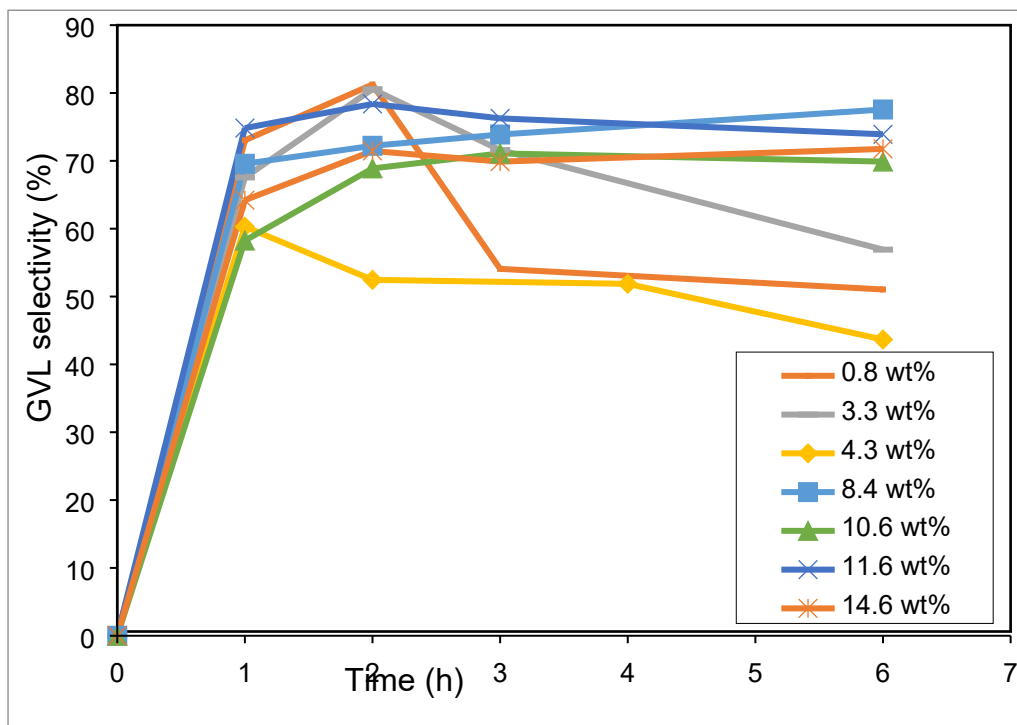

**Figure S10.** GVL selectivity as a function of EL reaction time over ZrO<sub>2</sub>/SBA-15. Reaction conditions: 5 mmol EL:250 mmol IPA, 100 mg catalyst, 170 °C, 5 bar N<sub>2</sub>.

### Identification of Propyl Levulinate

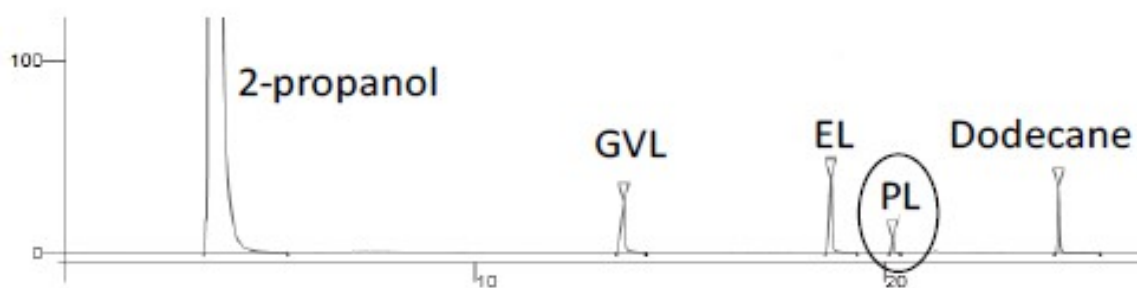

**Figure S11.** Gas chromatogram of reaction mixture for EL conversion to GVL over 11.6 wt% Zr/SBA-15 at 170 °C evidencing reactively-formed propyl levulinate (PL) intermediate.

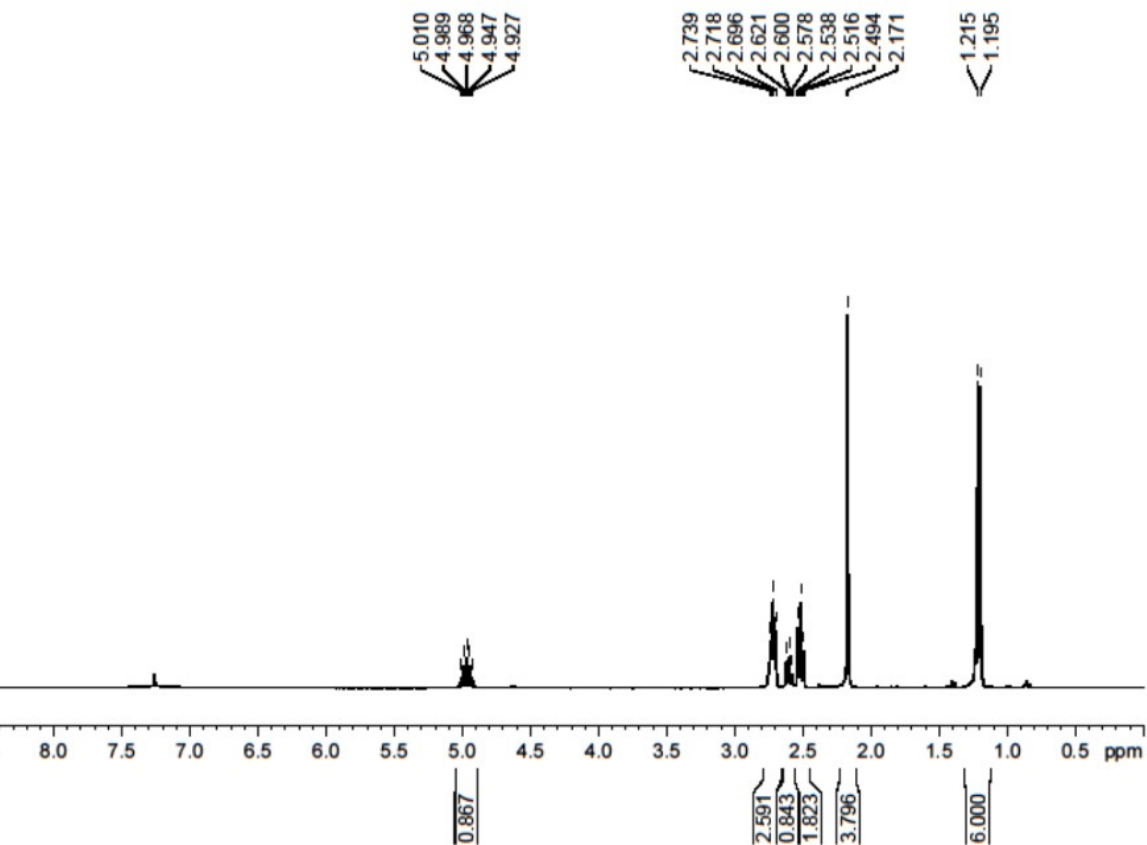

**Figure S12.**  $^1\text{H}$  NMR in  $\text{CDCl}_3$  of isopropyl levulinate (PL) formed during EL conversion to GVL over 11.6 wt% Zr/SBA-15 at 170  $^\circ\text{C}$ . NMR spectra were recorded on a Bruker Avance3 spectrometer operating at 300.14 MHz for  $^1\text{H}$  and referenced to residual solvent peaks.

**Batch reactor studies at 150  $^\circ\text{C}$**

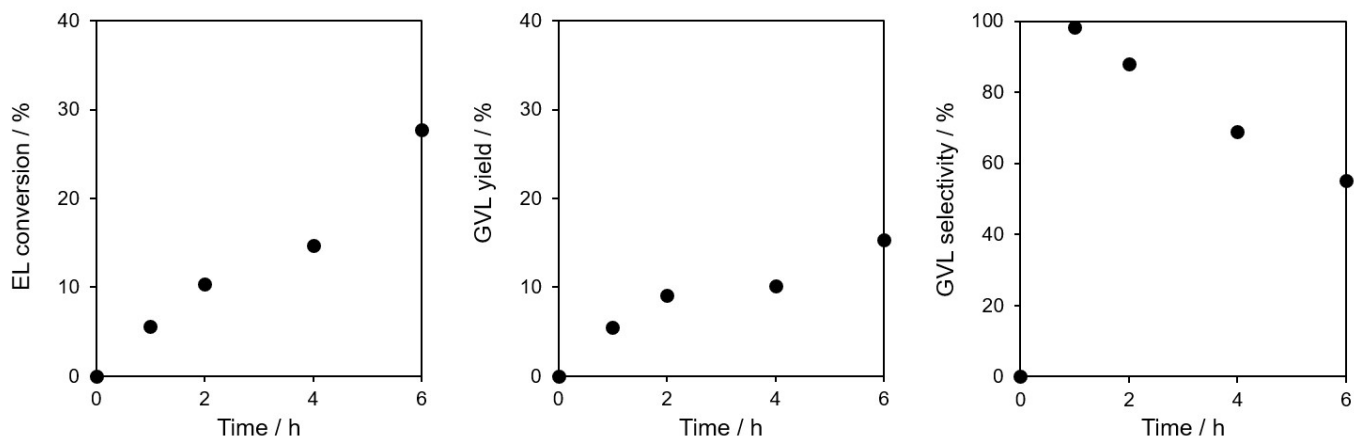

**Figure S13.** EL conversion, GVL yield and selectivity as a function of time for 11.6 wt% Zr/SBA-15. Reaction conditions: 5 mmol EL:250 mmol IPA, 100 mg catalyst, 150 °C, 5 bar N<sub>2</sub>.

### Flow reactor studies

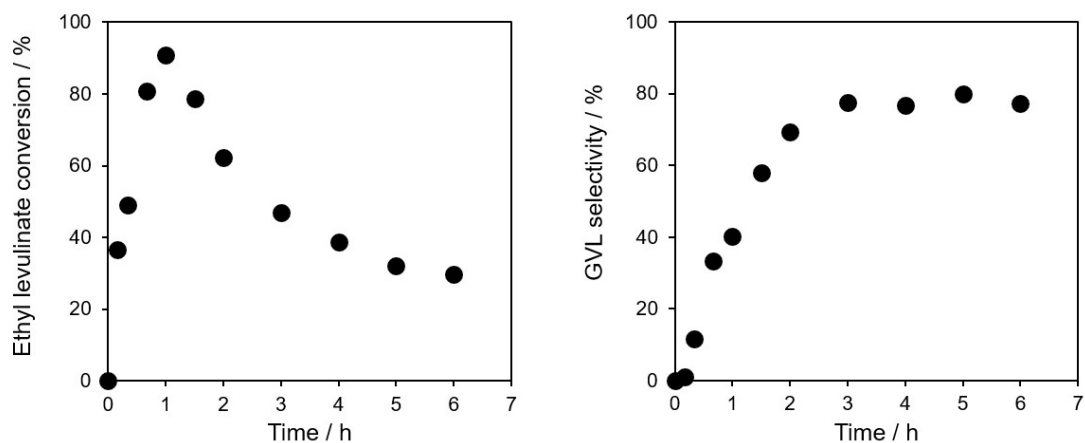

**Figure S14.** EL conversion and GVL selectivity as a function of reaction time for 11.6 wt% Zr/SBA-15. Reaction conditions: 0.25 M EL in IPA liquid feedstream, 100 mg catalyst, 150 °C, 0.1 ml/min, 27.5 min residence time.

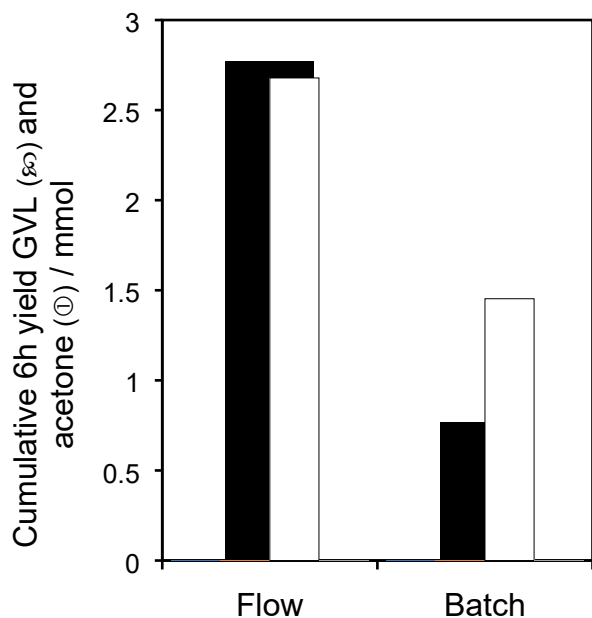

**Figure S15.** Comparison of cumulative GVL and acetone yields for 11.6 wt% Zr/SBA-15 in continuous flow versus batch operation. Reaction conditions: (**Flow**) 0.25 M EL in IPA liquid feedstream, 100 mg catalyst, 150 °C, 0.1 ml/min, 27.5 min residence time, over 6 h; (**Batch**) 5 mmol EL:250 mmol IPA, 100 mg catalyst, 150 °C, 5 bar, 6 h reaction.

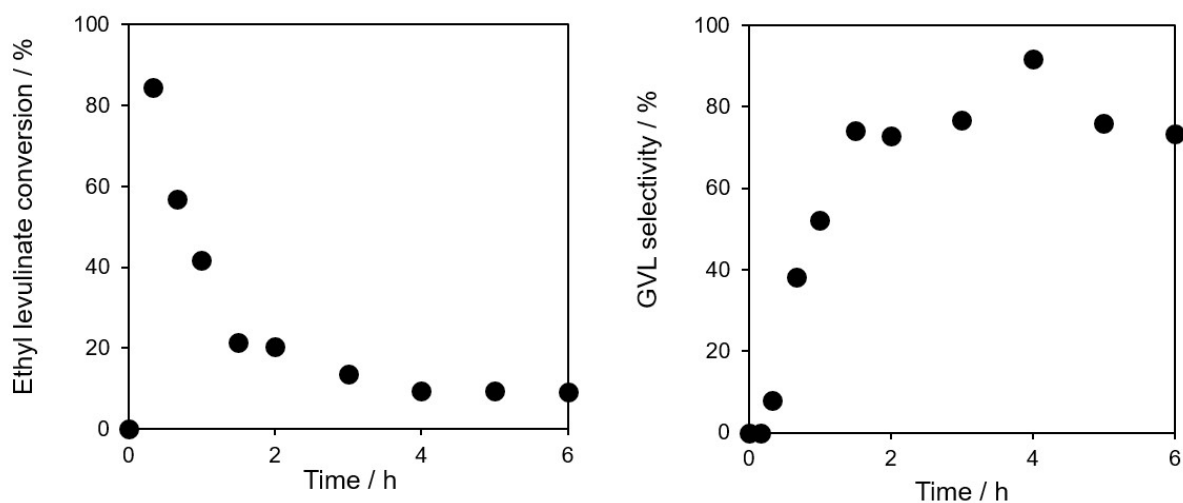

**Figure S16.** EL conversion and GVL selectivity as a function of reaction time for 11.6 wt% Zr/SBA-15. Reaction conditions: 0.25 M EL in IPA liquid feedstream, 100 mg catalyst, 150 °C, 0.18 ml/min, 17.5 min residence time.

## Optimisation studies

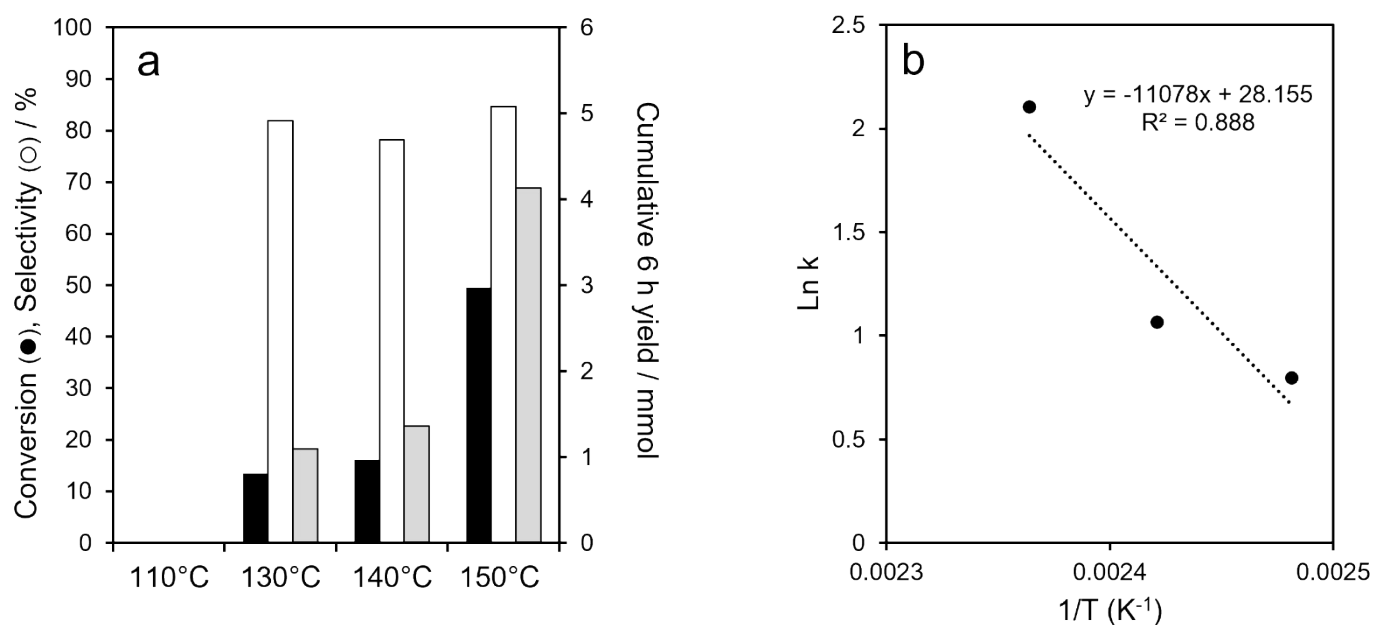

**Figure S17.** (a) Influence of reaction temperature on EL transformation to GVL in continuous flow over 12 wt% ZrO<sub>2</sub>/SBA-15. EL conversion and GVL selectivity are average over 6 h reaction. Reaction conditions: 100 mg catalyst, 27.5 min residence time, over 6 h, liquid stream of ethyl levuliate (0.25 M) and isopropyl alcohol. (b) Arrhenius plot of rate of EL conversion versus reaction temperature between 130-150 °C. Note these experiment were performed with a new catalyst batch which delivered slightly higher GVL selectivity.

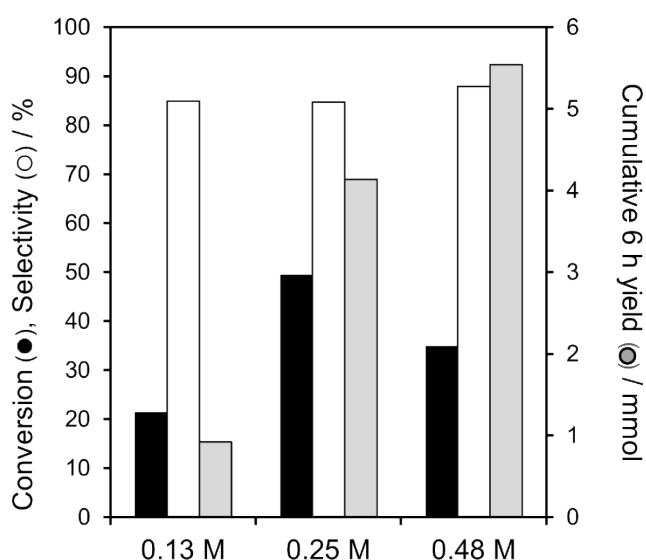

**Figure S18.** Influence of EL concentration on transformation to GVL under continuous flow over 12 wt% ZrO<sub>2</sub>/SBA-15. EL conversion and GVL selectivity are average over 6 h reaction. Reaction conditions: 100 mg catalyst, 27.5 min residence time, liquid stream of ethyl levulinate and isopropyl alcohol (0.13-0.48 M), 150°C. . Note these experiment were performed with a new catalyst batch which delivered slightly higher GVL selectivity.

### Spiking studies in continuous flow

Three reaction conditions were performed in the spiking studies, i) pre-treatment of the catalyst bed with acetone or GVL for 30 minutes at 150 °C prior to flowing reaction mixture over catalyst bed ii) stoichiometric (1:1) and iii) excess (5:1) poisoning of reaction mixture relative to EL.

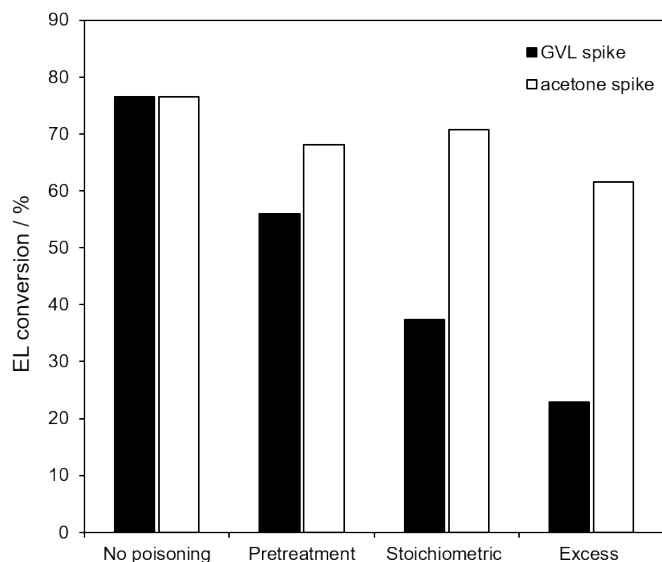

**Figure S19.** EL conversion averaged over 2 h reaction for 11.6 wt% Zr/SBA-15. Reaction conditions: **(Flow)** 0.25 M EL in IPA liquid feedstream, 100 mg catalyst, 150 °C, 0.1 ml/min, 27.5 min residence time, over 2 h. Pretreatment: Stream of GVL or acetone (0.1 ml/min) was passed over the catalyst bed for 30 minutes prior to starting reaction. Stoichiometric: GVL or acetone (1:1) was introduced in standard reaction mixture. Excess: GVL or acetone (5:1) was introduced in standard reaction mixture.

### Spent Catalyst Characterisation

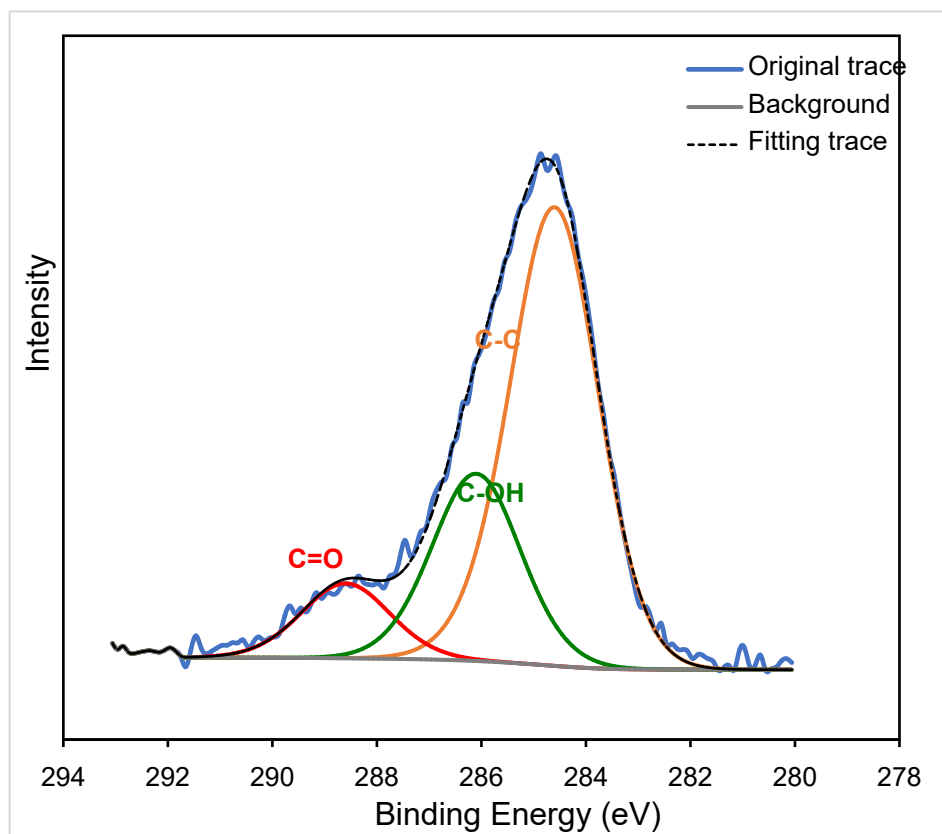

**Figure S20.** C 1s XPS spectra of post-reaction 11.6 wt% Zr/SBA-15 following 2 h EL conversion under continuous flow. Reaction conditions: Flow, 0.25 M EL in IPA liquid feedstream, (5:1) GVL spiking, 100 mg catalyst, 150 °C, 0.1 ml/min, 27.5 min residence time, over 2 h.

**Table S2.** Surface composition of as-prepared and post-reaction 11.6 wt% Zr/SBA-15.

| Catalyst      | Surface composition |      |      |      |       |      |     |       |
|---------------|---------------------|------|------|------|-------|------|-----|-------|
|               | wt%                 |      |      |      | at%   |      |     |       |
|               | O                   | C    | Zr   | Si   | O     | C    | Zr  | Si    |
| As-prepared   | 51.3                | 3.2  | 12.1 | 33.4 | 64.2  | 5.9  | 3.0 | 26.9  |
| Post-reaction | 43.6                | 10.5 | 13   | 32.9 | 55.49 | 17.8 | 2.9 | 23.81 |

### Recyclability test

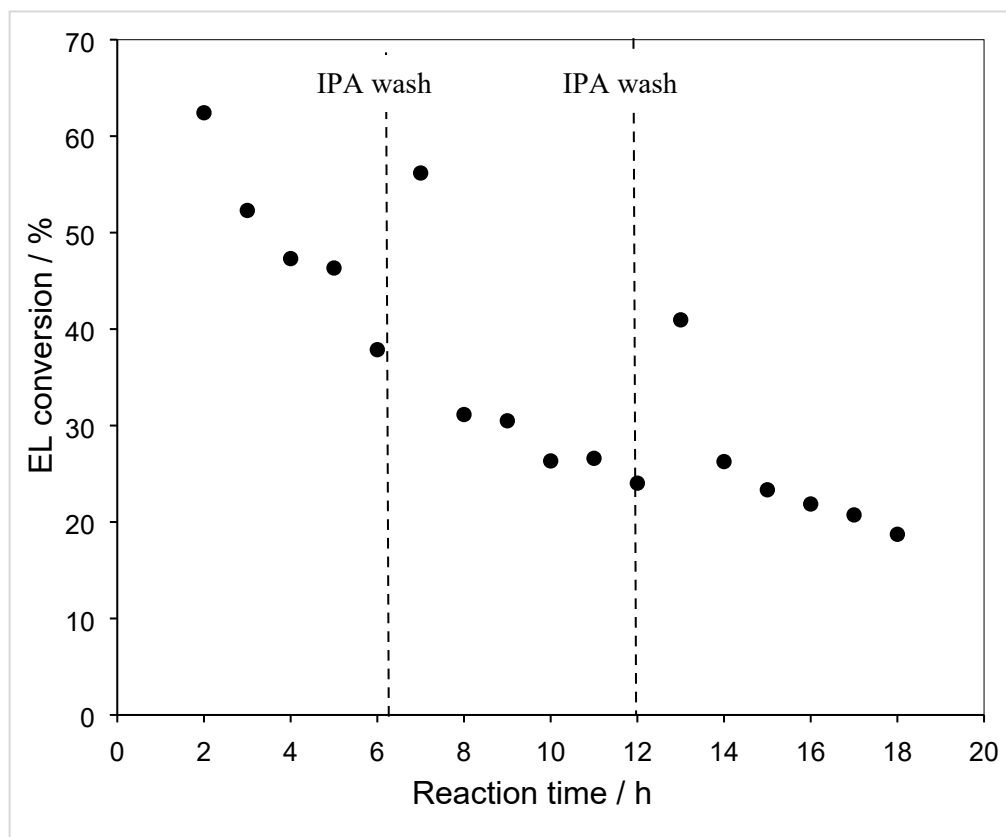

**Figure S21.** EL conversion as a function of time for three consecutive 6 h reactions in continuous flow over 12 wt% ZrO<sub>2</sub>/SBA-15; 2-isopropanol washes at indicated time intervals to attempt in-situ catalyst regeneration.
